# Supplementary material for: Multivariate Risk Analysis of RAS, BRAF and EGFR Mutations Allelic Frequency and Coexistence as Colorectal Cancer Predictive Biomarkers
Source: MDPI journal article supplement (doi:10.3390/cancers14112792), 2022-06-04
Supplement: s1 [file s1]

# Multivariate Risk Analysis of RAS, BRAF and EGFR Mutations Allelic Frequency and Coexistence as Colorectal Cancer Predictive Biomarkers

Adriana Ionescu, Liviu Bileanu, Ovidiu Ionut Geicu, Florin Iordache, Loredana Stanca, Aurelia Magdalena Pisoschi, Adrian Miron, Andreea Iren Serban and Valentin Calu

**Table S1.** Clinical and demographic data of the studied cohort.

| Variable                      | Mean                           | Median       | Std. Deviation | Min.           | Max.      |
|-------------------------------|--------------------------------|--------------|----------------|----------------|-----------|
| <b>Age (yrs)</b>              | <b>67.16</b>                   | <b>68.50</b> | <b>11.02</b>   | <b>32</b>      | <b>87</b> |
| Female                        | 69.12                          | 69.00        | 9.84           | 50             | 84        |
| Male                          | 65.54                          | 66.00        | 11.44          | 22             | 87        |
| <b>BMI (kg/m<sup>2</sup>)</b> | <b>26.74</b>                   | <b>26.52</b> | <b>3.97</b>    | <b>18</b>      | <b>41</b> |
| Female                        | 27.18                          | 26.30        | 4.55           | 19             | 41        |
| Male                          | 26.38                          | 26.63        | 3.45           | 18             | 33        |
| Variable                      | Category                       |              | Frequency      | Percentage (%) |           |
| Sex                           | Female                         |              | 26             | 43.3           |           |
|                               | Male                           |              | 34             | 56.7           |           |
| BMI (kg/m <sup>2</sup> )      | Underweight (<18.5)            |              | 1              | 1.7            |           |
|                               | Normal weight (18.5 to 24.9)   |              | 16             | 26.7           |           |
|                               | Overweight (≥ 25)              |              | 41             | 71.6           |           |
|                               | Pre-obesity (25.0 to 29.9)     |              | 31             | 51.7           |           |
|                               | Class 1 obesity (30.0 to 34.9) |              | 9              | 15.0           |           |
|                               | Class 2 obesity (30.0 to 34.9) |              | 0              | 0              |           |
|                               | Class 3 obesity (≥ 40)         |              | 1              | 1.7            |           |
|                               | Unreported                     |              | 2              | NA             |           |

|                    |                      |    |      |
|--------------------|----------------------|----|------|
| Diabetes           | Diabetic patients    | 30 | 51.7 |
|                    | Female               | 12 | 19.0 |
|                    | Male                 | 20 | 32.7 |
|                    | Non-diabetics        | 28 | 48.3 |
|                    | Female               | 14 | 24.1 |
|                    | Male                 | 14 | 24.1 |
| Smoking            | Smoking patients     | 12 | 20.7 |
|                    | Female               | 2  | 4.5  |
|                    | Male                 | 11 | 18.2 |
|                    | Non-smoking patients | 46 | 79.3 |
|                    | Female               | 24 | 41.4 |
|                    | Male                 | 22 | 37.9 |
| Tumor localization | Left (L)             | 41 | 70.7 |
|                    | Right (R)            | 17 | 29.3 |
| ypT stage          | T2                   | 6  | 10.3 |
|                    | T3                   | 39 | 67.2 |
|                    | T4                   | 13 | 22.4 |
| ypN stage          | N0                   | 31 | 53.4 |
|                    | N1                   | 20 | 34.5 |
|                    | N2                   | 7  | 12.1 |
| ypM stage          | M0                   | 40 | 69.0 |
|                    | M1                   | 18 | 31.0 |
| AJCC Staging       | I                    | 5  | 8.6  |
|                    | IIA                  | 18 | 31.0 |
|                    | IIB                  | 2  | 3.4  |
|                    | IIIA                 | 2  | 3.4  |
|                    | IIIB                 | 1  | 1.7  |
|                    | IIIC                 | 8  | 13.8 |

|            |    |      |
|------------|----|------|
| IV         | 20 | 34.5 |
| Unreported | 2  | NA   |

Unreported cases are not included in the percentage calculations.

**Table S2. Descriptive statistics of mutation levels (allelic frequencies) of all studied mutations**

| ALL cases included               |             |          |              |          |              |         |       |
|----------------------------------|-------------|----------|--------------|----------|--------------|---------|-------|
|                                  |             | KRAS Q61 | KRAS G12/G13 | NRAS Q61 | NRAS G12/G13 | BRAF    | EGFR  |
| LINEAR SCALE                     |             |          |              |          |              |         |       |
| Mean                             |             | 0.72     | 75.76        | 2.81     | 14.84        | 21.58   | 0.23  |
| 95% Confidence Interval for Mean | Lower Bound | 0.57     | 40.74        | -0.56    | -0.72        | 4.52    | -0.15 |
|                                  | Upper Bound | 0.87     | 110.77       | 6.18     | 30.39        | 38.65   | 0.60  |
| 5% Trimmed Mean                  |             | 0.69     | 58.35        | 0.45     | 2.59         | 9.84    | 0.00  |
| Median                           |             | 0.82     | 4.95         | 0.00     | 0.76         | 0.00    | 0.00  |
| Variance                         |             | 0.34     | 18377.06     | 170.16   | 3624.54      | 4362.42 | 2.09  |
| Std. Deviation                   |             | 0.58     | 135.56       | 13.04    | 60.20        | 66.05   | 1.44  |
| Minimum                          |             | 0.00     | 0.25         | 0.00     | 0.00         | 0.00    | 0.00  |
| Maximum                          |             | 3.48     | 599.63       | 85.48    | 342.30       | 266.46  | 11.07 |
| Range                            |             | 3.48     | 599.38       | 85.48    | 342.30       | 266.46  | 11.07 |
| Interquartile Range              |             | 0.96     | 86.94        | 0.86     | 0.88         | 0.04    | 0.00  |
| Skewness                         |             | 1.51     | 1.98         | 5.67     | 4.70         | 3.05    | 7.44  |
| Kurtosis                         |             | 7.30     | 3.44         | 32.42    | 22.25        | 7.97    | 56.54 |
| Percentiles                      |             |          |              |          |              |         |       |
| 25                               |             | 0.65     | 2.78         | 0.00     | 0.14         | 0.00    | 0.00  |
| 33                               |             | 0.82     | 3.17         | 0.00     | 0.65         | 0.00    | 0.00  |
| 50                               |             | 0.90     | 4.95         | 0.00     | 0.76         | 0.00    | 0.00  |
| 67                               |             | 0.96     | 10.67        | 0.76     | 0.96         | 0.00    | 0.00  |

|                                       |                |          |              |          |              |          |       |
|---------------------------------------|----------------|----------|--------------|----------|--------------|----------|-------|
| 75                                    |                | 0.00     | 89.72        | 0.86     | 1.02         | 0.12     | 0.00  |
| Mutation-free cases excluded          |                |          |              |          |              |          |       |
|                                       |                | KRAS Q61 | KRAS G12/G13 | NRAS Q61 | NRAS G12/G13 | BRAF     | EGFR  |
| LINEAR SCALE                          |                |          |              |          |              |          |       |
| Mean                                  |                | 0.99     | 75.76        | 6.25     | 19.78        | 92.50    | 4.51  |
| 95% Confidence Inter-<br>val for Mean | Lower<br>Bound | 0.85     | 40.74        | -1.30    | 27.3401      | 24.68    | -9.66 |
|                                       | Upper<br>Bound | 1.12     | 110.77       | 13.79    | 157.6542     | 147.99   | 18.68 |
| 5% Trimmed Mean                       |                | 0.93     | 58.35        | 2.58     | 5.52         | 87.96    | 0.00  |
| Median                                |                | 0.88     | 4.95         | 0.87     | 0.87         | 22.53    | 1.74  |
| Variance                              |                | 0.20     | 18377.06     | 363.86   | 4760.14      | 12734.88 | 32.54 |
| Std. Deviation                        |                | 0.44     | 135.56       | 19.08    | 68.99        | 112.885  | 5.70  |
| Minimum                               |                | 0.56     | 0.25         | 0.53     | 0.56         | 0.12     | 0.72  |
| Maximum                               |                | 3.48     | 599.63       | 85.48    | 342.30       | 266.46   | 11.07 |
| Range                                 |                | 2.92     | 599.38       | 84.95    | 341.74       | 266.34   | 10.35 |
| Interquartile Range                   |                | 0.34     | 86.94        | 0.93     | 0.46         | 233.56   | .     |
| Skewness                              |                | 4.33     | 1.98         | 3.71     | 4.01         | .643     | 1.67  |
| Kurtosis                              |                | 23.73    | 3.44         | 13.35    | 15.94        | -1.577   | .     |
| Percentiles                           |                |          |              |          |              |          |       |
| 25                                    |                | 0.80     | 2.78         | 0.73     | 0.71         | 0.26     | 0.72  |
| 33                                    |                | 0.82     | 3.17         | 0.77     | 0.75         | 0.32     | 1.05  |
| 50                                    |                | 0.88     | 4.95         | 0.87     | 0.87         | 22.53    | 1.74  |
| 67                                    |                | 0.96     | 10.67        | 1.02     | 1.02         | 172.98   | 8.08  |
| 75                                    |                | 1.15     | 89.72        | 1.66     | 1.17         | 233.82   |       |
| =                                     |                | KRAS Q61 | KRAS G12/G13 | NRAS Q61 | NRAS G12/G13 | BRAF     | EGFR  |
| LOG SCALE                             |                |          |              |          |              |          |       |

|                                  |             |       |       |       |         |       |       |
|----------------------------------|-------------|-------|-------|-------|---------|-------|-------|
| Mean                             |             | -0.03 | 1.04  | 0.12  | 0.16    | 0.81  | 0.38  |
| 95% Confidence Interval for Mean | Lower Bound | -0.07 | 0.81  | -0.09 | -0.0438 | -0.18 | -1.12 |
|                                  | Upper Bound | 0.01  | 1.27  | 0.33  | 1.6555  | 1.51  | 1.89  |
| 5% Trimmed Mean                  |             | -0.04 | 1.03  | 0.05  | 0.05    | 0.81  | .     |
| Median                           |             | -0.06 | 0.69  | -0.06 | -0.06   | 0.75  | 0.24  |
| Variance                         |             | 0.02  | 0.80  | 0.28  | 0.47    | 2.16  | 0.37  |
| Std. Deviation                   |             | 0.13  | 0.89  | 0.53  | 0.68    | 1.47  | 0.61  |
| Minimum                          |             | -0.25 | -0.60 | -0.28 | -0.25   | -0.92 | -0.14 |
| Maximum                          |             | 0.54  | 2.78  | 1.93  | 2.53    | 2.43  | 1.04  |
| Range                            |             | 0.79  | 3.38  | 2.21  | 2.79    | 3.35  | 1.19  |
| Interquartile Range              |             | 0.15  | 1.50  | 0.36  | 0.22    | 2.97  | .     |
| Skewness                         |             | 1.85  | 0.64  | 2.80  | 2.83    | 0.00  | 0.99  |
| Kurtosis                         |             | 6.79  | -0.84 | 7.65  | 6.91    | -2.18 | .     |
| Percentiles                      |             |       |       |       |         |       |       |
| 25                               |             | -0.10 | 0.44  | -0.14 | -0.15   | -0.60 | -0.14 |
| 33                               |             | -0.09 | 0.50  | -0.11 | -0.12   | -0.50 | -0.02 |
| 50                               |             | -0.06 | 0.69  | -0.06 | -0.06   | 0.75  | 0.24  |
| 67                               |             | -0.02 | 1.03  | 0.01  | 0.01    | 2.24  | 0.79  |
| 75                               |             | 0.06  | 1.94  | 0.22  | 0.07    | 2.37  |       |

## Coexistence of mutations and their associations with clinical and histopathological data

How mutations are mutually influencing each other, the so-called coexistence of mutations was determined by calculating the OR- and RR-type parameters in all possible situations where one of the mutations is considered a determining factor (determinant variable) for the other mutations that were considered dependent on this mutation (outcome variables). We considered the following situations:

1. Coexistence of mutations, regardless of AF%. We thus distinguish for each mutation two cases: absence (encoded by the symbol 0) and presence (encoded by the symbol 1). In short, we have the following situations for each mutation X,

$$X = \begin{cases} 0, & \text{if } AF(X) = 0 \\ 1, & \text{if } AF(X) \geq 0.1 \end{cases} \quad (S1)$$

So, if X is the determinant mutation and Y is the outcome variable, we denote by X = 0 if the mutation X is absent and by X = 1 if the mutation X is present. By X or Y, we mean one of the studied mutations, KRAS Q61, KRAS G12 / G13, NRAS Q61, NRAS G12 / G13 or BRAF.

2. Coexistence of mutations taking into account AF% values. In this case, we have the following notations:

$$X = \begin{cases} 0, & \text{if } AF(X) = 0 \\ 1, & \text{if } 0.1 \leq AF(X) < 1 \\ 2, & \text{if } AF(X) \geq 1 \end{cases} \quad (S2)$$

in the first case (in which we first considered that a mutation is present if  $AF \geq 0.1$ ), we calculated the following coefficients:

Odds-ratio (OR) is invariable at the change  $X \rightarrow Y$  and is calculated as the ratio of the following probabilities

$$OR = \frac{\frac{P(|Y = 0|X = 0)}{P(|Y = 1|X = 0)}}{\frac{P(|Y = 0|X = 1)}{P(|Y = 1|X = 1)}} = \frac{\frac{P(|Y = 1|X = 1)}{P(|Y = 0|X = 1)}}{\frac{P(|Y = 1|X = 0)}{P(|Y = 0|X = 0)}} \quad (S3)$$

where  $P(|Y = 0|X = 0)$  is the relative probability or frequency of cases for which Y = 0 (Y mutation is absent), knowing that X = 0 (X mutation is present).

Relative risk ( $RR_1$ ) is calculated as:

$$RR_1 = \frac{P(Y = 1|X = 0)}{P(Y = 1|X = 1)} \quad (S4)$$

The risk of Y mutation in cases  $X = 0$  compared to cases  $X = 1$ . If  $RR_1 > 1$  or more precisely  $RR_1 \geq 1.3$ , then the cases  $X = 0$  (i.e. the cases in which the determinant mutation X is absent) have  $RR_1$  times higher relative risk than the cases  $X = 1$  (when the mutation X is present) to be associated with the presence of the Y mutation ( $Y = 1$ ). In short, the absence of the X mutation increases by  $RR_1$  folds the risk of the Y mutation occurrence compared to the absence of X mutation.

Relative risk ( $RR_2$ ) calculated as:

$$RR_2 = \frac{P(Y = 1|X = 1)}{P(Y = 1|X = 0)} \quad (S5)$$

that is, the risk of Y mutation in cases  $X = 1$  compared to cases  $X = 0$ . If  $RR_2 > 1$  (or more precisely  $RR_2 > 1.3$ ), then the cases  $X = 1$  (in which the determinant mutation X is present) have  $RR_2$  folds higher relative risk than the cases  $X = 0$  (when the mutation X is absent) to be associated with the presence of the Y mutation ( $Y = 1$ ). In other words, the presence of the X mutation increases by  $RR_2$  folds the risk of the Y mutation occurring if X is absent.

Relative risk ( $RR_3$ ) calculated as

$$RR_3 = \frac{P(Y = 0|X = 0)}{P(Y = 0|X = 1)} \quad (S6)$$

that is, the risk of Y mutation absence in cases  $X = 0$  compared to cases  $X = 1$ . If  $RR_3 > 1$  (or more precisely  $RR_3 > 1.3$ ), then the cases  $X = 0$  (in which the determinant mutation X is absent) have  $RR_3$  folds higher relative risk than the cases when the mutation X is present ( $X = 1$ ) to be associated with the absence of the Y mutation ( $Y = 0$ ). In other words, the absence of the X mutation increases by  $RR_3$  folds the risk of the Y mutation absence compared to X mutation presence.

We have the following equations between the four parameters

$$\begin{aligned} RR_1 \times RR_2 &= 1 \\ RR_1 \times RR_3 &= OR \end{aligned} \tag{S7}$$

The same coefficients OR, RR1 and RR3 were calculated for all possible combinations ( $X = \{0, 1, 2\} \mid Y = \{0, 1, 2\}$ ) were also calculated in the second case.

Risk factor - mutation association is expressed by the same type of coefficients. The variable Y is associated with the mutation's absence ( $Y = 0$ ) or presence ( $Y = 1$ ) in the above formulas. The variable X will be one of the clinical variables: sex,  $X \rightarrow \{F, M\}$ ; diabetes,  $X \rightarrow \{\text{no}, \text{yes}\}$  in which *no*- non diabetic patients, *yes* - diabetic patients; smoking:  $X \rightarrow \{\text{no}, \text{yes}\}$ , BMI:  $X - \{1, 2\}$  where 1- underweight + normal weight, 2- overweight and obese patients. The meaning of the parameters OR, RR1, RR 2 and RR3 is the same as above. We used the OR and RR parameters defined above to study the association of a mutation as a risk factor for the values of tumour-related variables (laterality, histopathological features, tumour staging) listed in Table S3. In this case, the variable X in the above equations represents the presence or absence of one of the mutations, and Y represents one of the variables listed with the possible values, as shown in Table S3. A significant association between a clinical or a histopathological variable and a mutation will be considered when  $RR > 1.3$ .

**Table S3. Expressing associations between mutation levels via risk ratios RR1, RR2 and RR3**

| Independent mutations values | Outcome mutation values | RR1 > 1.3 | RR2 > 1.3 | RR3 > 1.3 |
|------------------------------|-------------------------|-----------|-----------|-----------|
|------------------------------|-------------------------|-----------|-----------|-----------|



|                                                                              |                                                                                 |                                                                                                                     |                                                                                                                                         |                                                                                                                                     |
|------------------------------------------------------------------------------|---------------------------------------------------------------------------------|---------------------------------------------------------------------------------------------------------------------|-----------------------------------------------------------------------------------------------------------------------------------------|-------------------------------------------------------------------------------------------------------------------------------------|
| $X \rightarrow \{0,1\}$                                                      | $Y \rightarrow \{0,1\}$                                                         | The absence of the X mutation determines the presence of $0.1 \leq AF < 1$ levels of the Y mutation preferentially. | The presence of $0.1 \leq AF < 1$ levels of the X mutation determines the presence of $AF < 1$ levels of the Y mutation preferentially. | The X mutation's absence determines the Y mutation's absence rather than the presence of $0.1 \leq AF < 1$ levels of this mutation. |
| The cases with $AF = 0$ or $0.1 \leq AF < 1$ for both X and Y mutations      |                                                                                 |                                                                                                                     |                                                                                                                                         |                                                                                                                                     |
| $X \rightarrow \{0,1\}$ i.e.<br>The cases with $AF = 0$ or $0.1 \leq AF < 1$ | $Y \rightarrow \{0,2\}$ i.e.<br>The cases with $AF = 0$ or $AF \geq 1$          | The absence of the X mutation determines the presence of $AF \geq 1$ levels of Y mutation preferentially.           | The presence of $0.1 \leq AF < 1$ levels of the X mutation determines the presence of $AF \geq 1$ levels of Y mutation preferentially.  | The X mutation's absence determines the Y mutation's absence.                                                                       |
| $X \rightarrow \{0,1\}$ i.e.<br>The cases with $AF = 0$ or $0.1 \leq AF < 1$ | $Y \rightarrow \{1,2\}$ i.e.<br>The cases with $0.1 \leq AF < 1$ or $AF \geq 1$ | The absence of the X mutation determines the presence of $AF \geq 1$ levels of Y mutation preferentially.           | The presence of $0.1 \leq AF < 1$ levels of the X mutation determines the presence of $AF \geq 1$ levels of Y mutation preferentially.  | The X mutation's absence determines the Y mutation's presence of $0.1 \leq AF < 1$ levels preferentially.                           |
| $X \rightarrow \{0,2\}$ i.e.<br>The cases with $AF = 0$ or $AF \geq 1$       | $Y \rightarrow \{0,1\}$ i.e.<br>The cases with $AF = 0$ or $0.1 \leq AF < 1$    | The absence of the X mutation determines the presence of $0.1 \leq AF < 1$                                          | The presence of $AF \geq 1$ levels of the X mutation determines the presence                                                            | The X mutation's absence determines the absence of the Y mutation preferentially.                                                   |

|                                                                                 |                                                                              |                                                                                                                                         |                                                                                                                                        |                                                                                                                     |
|---------------------------------------------------------------------------------|------------------------------------------------------------------------------|-----------------------------------------------------------------------------------------------------------------------------------------|----------------------------------------------------------------------------------------------------------------------------------------|---------------------------------------------------------------------------------------------------------------------|
|                                                                                 |                                                                              | levels of the Y mutation preferentially.                                                                                                | of $0.1 \leq AF < 1$ levels preferentially.                                                                                            |                                                                                                                     |
| $X \rightarrow \{0,2\}$ i.e.                                                    | $Y \rightarrow \{0,2\}$ i.e.                                                 | The absence of the X mutation determines the presence of $AF \geq 1$ levels of the Y mutation preferentially.                           | The presence of $AF \geq 1$ levels of the X mutation determines the presence of $AF \geq 1$ levels of the Y mutation preferentially.   | The X mutation's absence determines the absence of the Y mutation preferentially.                                   |
| The cases with $AF = 0$ or $AF \geq 1$                                          |                                                                              |                                                                                                                                         |                                                                                                                                        |                                                                                                                     |
| $X \rightarrow \{0,2\}$ i.e.<br>The cases with $AF = 0$ or $AF \geq 1$          | $Y \rightarrow \{1,2\}$ i.e.<br>The cases with $0 < AF < 1$ or $AF \geq 1$   | The absence of the X mutation determines the presence of $AF \geq 1$ levels of Y mutation preferentially.                               | The presence of $0.1 \leq AF < 1$ levels of the X mutation determines the presence of $AF \geq 1$ levels of Y mutation preferentially. | The absence of the X mutation determines the presence of $0.1 \leq AF < 1$ levels of Y mutation preferentially.     |
| $X \rightarrow \{1,2\}$ i.e.<br>The cases with $0.1 \leq AF < 1$ or $AF \geq 1$ | $Y \rightarrow \{0,1\}$ i.e.<br>The cases with $AF = 0$ or $0.1 \leq AF < 1$ | The presence of $AF < 1$ levels of the X mutation determines the presence of $0.1 \leq AF < 1$ levels of the Y-mutation preferentially. | The presence of $AF \geq 1$ levels of the X mutation determines the presence of $0.1 \leq AF < 1$ levels of Y mutation preferentially. | The presence of $0.1 \leq AF < 1$ levels of the X mutation determines the absence of the Y-mutation preferentially. |
| $X \rightarrow \{1,2\}$ i.e.<br>The cases with $0.1 \leq AF < 1$ or $AF \geq 1$ | $Y \rightarrow \{0,2\}$ i.e.<br>The cases with $AF = 0$ or $AF \geq 1$       | The presence of $0.1 \leq AF < 1$ levels of the X                                                                                       | The presence of $AF \geq 1$ levels of the X mutation                                                                                   | The presence of $0.1 \leq AF < 1$ levels of the X                                                                   |

|                                                 |                         |                                                                                                                                        |                                                                                                                                  |                                                                                                                                                  |
|-------------------------------------------------|-------------------------|----------------------------------------------------------------------------------------------------------------------------------------|----------------------------------------------------------------------------------------------------------------------------------|--------------------------------------------------------------------------------------------------------------------------------------------------|
|                                                 |                         | mutation determines the presence of $AF \geq 1$ levels of Y mutation preferentially.                                                   | determines the presence of $AF \geq 1$ levels of Y mutation than the absence of the Y-mutation preferentially.                   | mutation determines the absence of the Y-mutation preferentially.                                                                                |
| $X \rightarrow \{1,2\}$                         | $Y \rightarrow \{1,2\}$ | The presence of $0.1 \leq AF < 1$ levels of the X mutation determines the presence of $AF \geq 1$ levels of Y-mutation preferentially. | The presence of $AF \geq 1$ levels of the X mutation determines the presence of $AF \geq 1$ levels of Y-mutation preferentially. | The presence of $0.1 \leq AF < 1$ levels of the X mutation determines the presence of $0.1 \leq AF < 1$ levels of the Y-mutation preferentially. |
| The cases with $0.1 \leq AF < 1$ or $AF \geq 1$ |                         |                                                                                                                                        |                                                                                                                                  |                                                                                                                                                  |

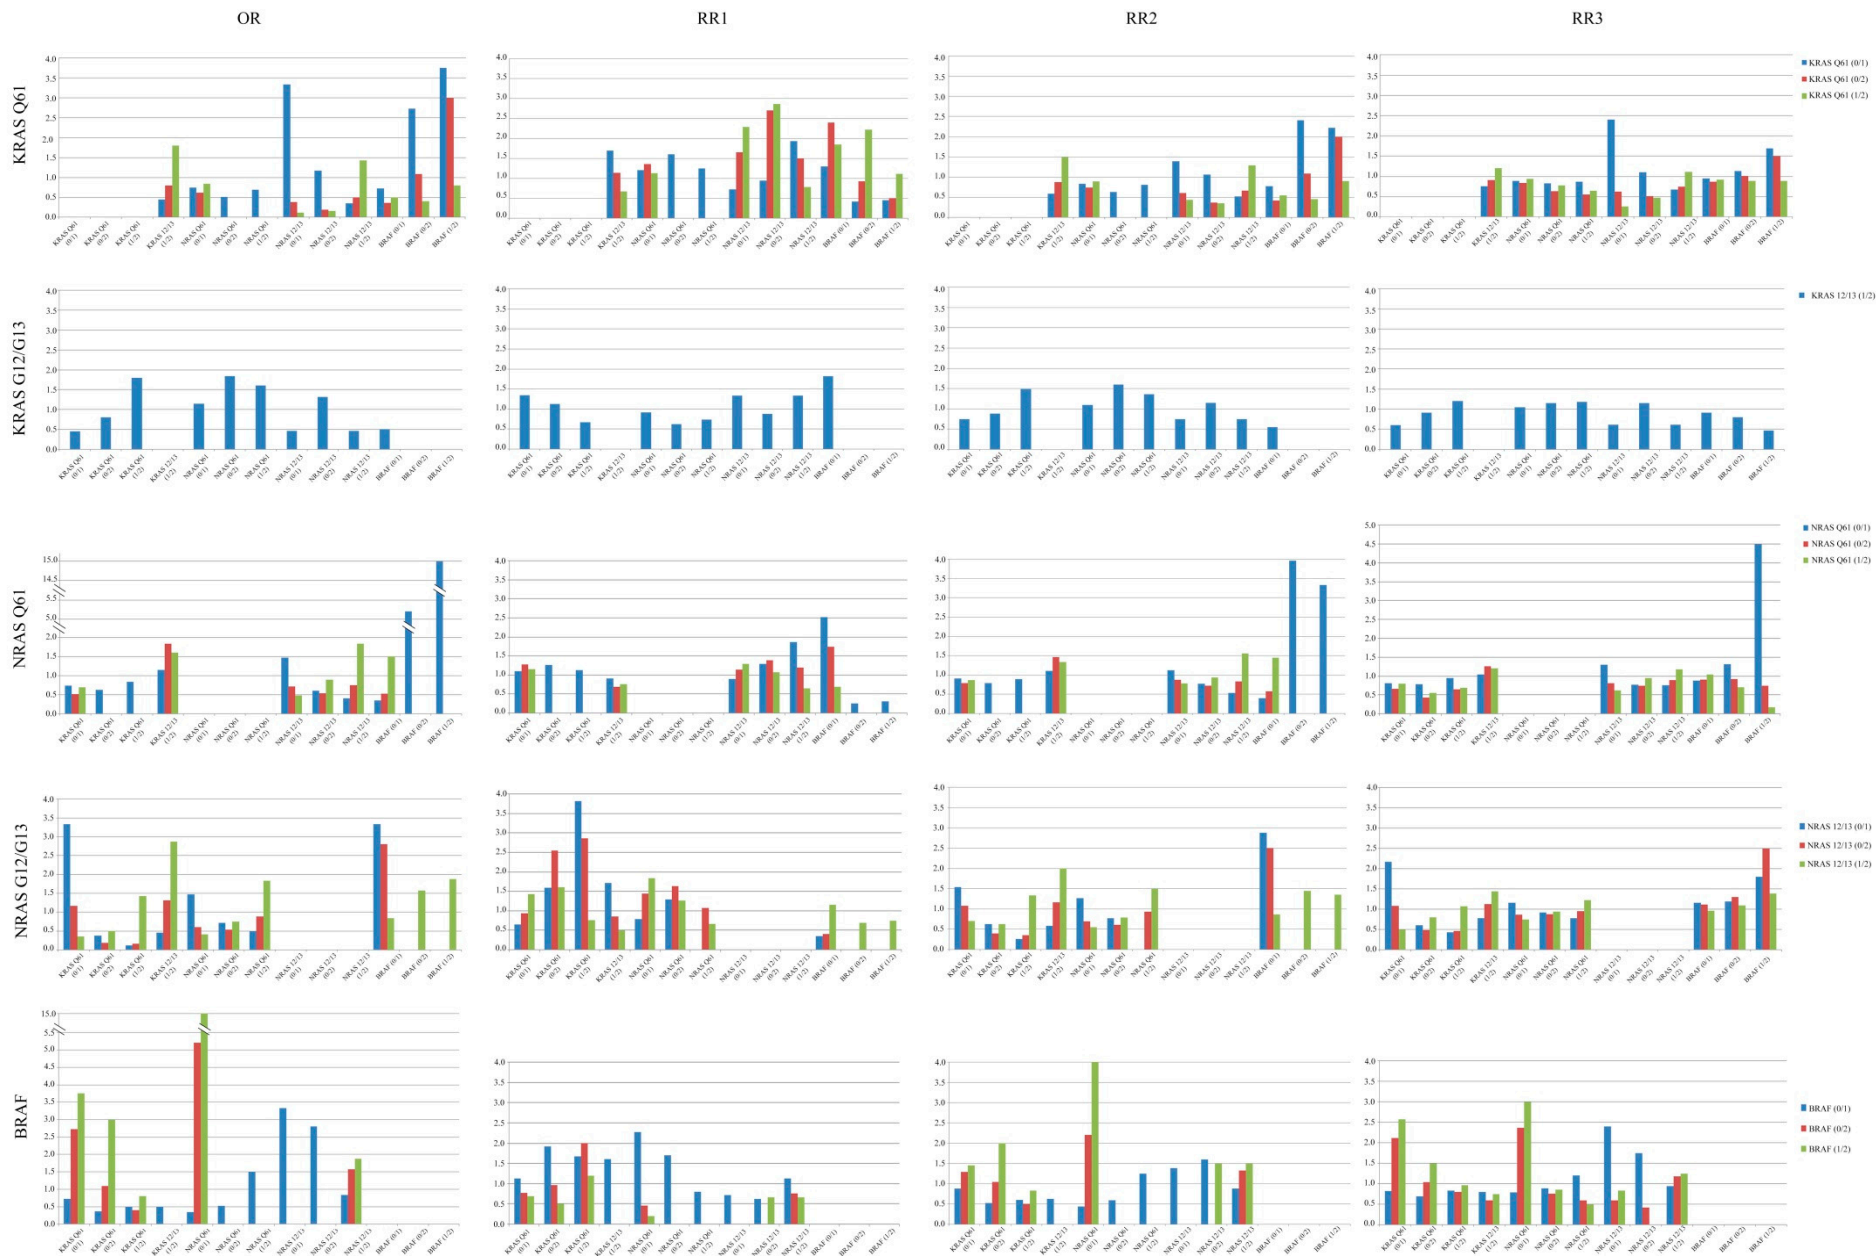

Figure S1. Risk analysis via OR, RR1, RR2 and RR3 of possible two-by-two associations between the studied mutations, defined according to Table S3

Table S4. Models used for OR, RR1, RR2 and RR3 calculation related to mutations status and tumour pathological features

|                                                                                                                                                                                                                                                                                                                                                                                                                                                                                                                                     |                                                                                                                                                                                                                                                                                                                                                                                                                                                                                                                                                                                                                                                                                                                                                                          |
|-------------------------------------------------------------------------------------------------------------------------------------------------------------------------------------------------------------------------------------------------------------------------------------------------------------------------------------------------------------------------------------------------------------------------------------------------------------------------------------------------------------------------------------|--------------------------------------------------------------------------------------------------------------------------------------------------------------------------------------------------------------------------------------------------------------------------------------------------------------------------------------------------------------------------------------------------------------------------------------------------------------------------------------------------------------------------------------------------------------------------------------------------------------------------------------------------------------------------------------------------------------------------------------------------------------------------|
| 1 – tumour invasion limited by the submucosa,<br>2 – tumour invasion beyond the submucosa;<br><i>Limits of invasion model 2</i><br>1 – tumour invasion limited by the muscularis mucosa,<br>2 – tumour invasion beyond the muscularis mucosa;<br><i>Limits of invasion model 3</i><br>1 – tumour invasion limited by the subserosa,<br>2 – tumour invasion beyond the muscularis subserosa;<br><i>Limits of invasion model 4</i><br>1 – tumour invasion limited by the serosa,<br>2 – tumour invasion beyond the muscularis serosa; | <b>Tumour localization / laterality</b><br>L – left colon; R – right colon;<br><b>ALL mutations</b><br>0 – the mutation is absent, 1 – the mutation is present<br><b>Tumour differentiation grade</b><br><i>Differentiation grade grouping model 1</i><br>1 – well-differentiated / 2 - moderately and poorly differentiated tumours<br><i>Differentiation grade grouping model 2</i><br>1 – well and moderately / 2 - poorly differentiated tumours<br><b>Histopathological pattern</b><br><i>Tubular pattern</i><br>0 – absent, 1 – present<br><i>Cribriform pattern</i><br>0 – absent, 1 – present<br><i>Necrosis</i><br>0 – absent, 1 – present<br><i>Mucoid phenotype</i><br>0 – absent, 1 – present<br><b>Invasion limits</b><br><i>Limits of invasion model 1</i> |
| <b>Desmoplastic reaction</b><br><i>Desmoplastic reaction Model1</i><br>1 – "low"; 2 – "moderate and high"<br><i>Desmoplastic reaction Model2</i><br>1 – "low and moderate"; 2 – "high"<br><b>Lymphovascular invasion, perineural invasion, adenomatous polyps or budding</b><br>0 – absent; 1 – present;<br><b>Inflammatory infiltrates</b>                                                                                                                                                                                         |                                                                                                                                                                                                                                                                                                                                                                                                                                                                                                                                                                                                                                                                                                                                                                          |

*ypT Model 1*  
1 – ypT2 or ypT3; 2 – ypT4

*ypT Model 2*  
1 – ypT2; 2 – ypT3 or ypT4

**ypN Staging**

*ypN Model 1*  
1 – ypN0 or ypN1; 2 – ypN2

*ypN Model 2*  
1 – ypN0; 2 – ypN1 or ypN2

**ypM Staging**  
M0 – no metastasis; M1 – metastasis in any organ;

**AJCC Staging**  
1 –stage II CRC; 2 – stages III and IV CRC;

*Mixed peri- and/or intratumoral infiltrate Model 1*  
1 – "absent"; 2 – "present (grade-independent) "

*Mixed peri- and/or intratumoral infiltrate Model 2*  
1 – "absent or low"; 2 – "moderate or high"

*Mixed peri- and/or intratumoral infiltrate Model 3*  
1 – "absent or low or moderate"; 2 – "high"

*Lymphocyte peri- and/or intratumoral Model 1*  
1 – "absent"; 2 – "present (grade-independent)"

*Lymphocyte peri- and/or intratumoral Model 2*  
1 – "absent or low"; 2 – "moderate or high"

*Lymphocyte peri- and/or intratumoral Model 3*  
1 – "absent or low or moderate"; 2 – "high"

**ypT Staging**

**Table S5. Risk estimation calculations using the models presented in Table S3. Parameters OR, RR1, RR2 and RR3 have been defined above.**

| Independent variable (Mutation) | Outcome Variable                 | Symbol | Value | 95% IC LB | 95% IC UB |
|---------------------------------|----------------------------------|--------|-------|-----------|-----------|
| KRAS Q61 (0/1)                  | Tumor Localization (left/right)  | OR     | 1.192 | 0.319     | 4.445     |
| KRAS Q61 (0/1)                  | Tumor Localization (left/right)  | RR1    | 0.882 | 0.340     | 2.290     |
| KRAS Q61 (0/1)                  | Tumor Localization (left/right)  | RR2    | 1.134 | 0.592     | 1.676     |
| KRAS Q61 (0/1)                  | Tumor Localization (left/right)  | RR3    | 1.051 | 0.731     | 1.511     |
| KRAS Q61 (0/1)                  | HP differentiation model 1 (1/2) | OR     | 0.632 | 0.184     | 2.162     |
| KRAS Q61 (0/1)                  | HP differentiation model 1 (1/2) | RR1    | 1.194 | 0.765     | 1.865     |
| KRAS Q61 (0/1)                  | HP differentiation model 1 (1/2) | RR2    | 0.838 | 0.409     | 1.267     |
| KRAS Q61 (0/1)                  | HP differentiation model 1 (1/2) | RR3    | 0.754 | 0.342     | 1.663     |
| KRAS Q61 (0/1)                  | HP differentiation model 2 (1/2) | OR     | 1.842 | 0.198     | 17.179    |
| KRAS Q61 (0/1)                  | HP differentiation model 2 (1/2) | RR1    | 0.573 | 0.073     | 4.521     |
| KRAS Q61 (0/1)                  | HP differentiation model 2 (1/2) | RR2    | 1.745 | 1.245     | 2.245     |

|                |                                             |     |       |        |        |
|----------------|---------------------------------------------|-----|-------|--------|--------|
| KRAS Q61 (0/1) | HP differentiation model 2 (1/2)            | RR3 | 1.056 | 0.888  | 1.256  |
| KRAS Q61 (0/1) | For HP phenotype with tubular pattern (0/1) | OR  | 0.696 | 0.072  | 6.773  |
| KRAS Q61 (0/1) | For HP phenotype with tubular pattern (0/1) | RR1 | 1.029 | 0.872  | 1.215  |
| KRAS Q61 (0/1) | For HP phenotype with tubular pattern (0/1) | RR2 | 0.972 | 0.815  | 1.129  |
| KRAS Q61 (0/1) | For HP phenotype with tubular pattern (0/1) | RR3 | 0.717 | 0.087  | 5.917  |
| KRAS Q61 (0/1) | HP phenotype with cribriform pattern (0/1)  | OR  | 0.632 | 0.184  | 2.162  |
| KRAS Q61 (0/1) | HP phenotype with cribriform pattern (0/1)  | RR1 | 1.194 | 0.765  | 1.865  |
| KRAS Q61 (0/1) | HP phenotype with cribriform pattern (0/1)  | RR2 | 0.838 | 0.409  | 1.267  |
| KRAS Q61 (0/1) | HP phenotype with cribriform pattern (0/1)  | RR3 | 0.754 | 0.342  | 1.663  |
| KRAS Q61 (0/1) | Necrosis (0/1)                              | OR  | 0.552 | 0.166  | 1.829  |
| KRAS Q61 (0/1) | Necrosis (0/1)                              | RR1 | 1.433 | 0.718  | 2.861  |
| KRAS Q61 (0/1) | Necrosis (0/1)                              | RR2 | 0.698 | -0.017 | 1.413  |
| KRAS Q61 (0/1) | Necrosis (0/1)                              | RR3 | 0.791 | 0.472  | 1.326  |
| KRAS Q61 (0/1) | Limits of invasion model 1 (1/2)            | OR  | 1.464 | 0.123  | 17.415 |
| KRAS Q61 (0/1) | Limits of invasion model 1 (1/2)            | RR1 | 0.979 | 0.842  | 1.138  |
| KRAS Q61 (0/1) | Limits of invasion model 1 (1/2)            | RR2 | 1.021 | 0.884  | 1.158  |
| KRAS Q61 (0/1) | Limits of invasion model 1 (1/2)            | RR3 | 1.433 | 0.140  | 14.693 |
| KRAS Q61 (0/1) | Limits of invasion model 2 (1/2)            | OR  | 1.292 | 0.365  | 4.570  |
| KRAS Q61 (0/1) | Limits of invasion model 2 (1/2)            | RR1 | 0.925 | 0.618  | 1.384  |
| KRAS Q61 (0/1) | Limits of invasion model 2 (1/2)            | RR2 | 1.081 | 0.774  | 1.388  |
| KRAS Q61 (0/1) | Limits of invasion model 2 (1/2)            | RR3 | 1.194 | 0.504  | 2.828  |
| KRAS Q61 (0/1) | Limits of invasion model 3 (1/2)            | OR  | 3.107 | 0.923  | 10.462 |
| KRAS Q61 (0/1) | Limits of invasion model 3 (1/2)            | RR1 | 0.593 | 0.308  | 1.140  |
| KRAS Q61 (0/1) | Limits of invasion model 3 (1/2)            | RR2 | 1.686 | 1.401  | 1.971  |
| KRAS Q61 (0/1) | Limits of invasion model 3 (1/2)            | RR3 | 1.843 | 1.015  | 3.346  |
| KRAS Q61 (0/1) | Limits of invasion model 4 (1/2)            | OR  | 1.630 | 0.444  | 5.984  |
| KRAS Q61 (0/1) | Limits of invasion model 4 (1/2)            | RR1 | 0.717 | 0.284  | 1.807  |
| KRAS Q61 (0/1) | Limits of invasion model 4 (1/2)            | RR2 | 1.395 | 0.962  | 1.828  |

|                |                                                    |     |       |        |        |
|----------------|----------------------------------------------------|-----|-------|--------|--------|
| KRAS Q61 (0/1) | Limits of invasion model 4 (1/2)                   | RR3 | 1.168 | 0.797  | 1.712  |
| KRAS Q61 (0/1) | Desmoplastic Reaction Model 1                      | OR  | 4.222 | 0.485  | 36.767 |
| KRAS Q61 (0/1) | Desmoplastic Reaction Model 1                      | RR1 | 0.695 | 0.333  | 1.448  |
| KRAS Q61 (0/1) | Desmoplastic Reaction Model 1                      | RR2 | 1.439 | 1.077  | 1.801  |
| KRAS Q61 (0/1) | Desmoplastic Reaction Model 1                      | RR3 | 2.933 | 0.653  | 13.183 |
| KRAS Q61 (0/1) | Desmoplastic Reaction Model 2                      | RR1 | 0.367 | 0.061  | 2.205  |
| KRAS Q61 (0/1) | Desmoplastic Reaction Model 2                      | RR2 | 2.725 | 2.419  | 3.031  |
| KRAS Q61 (0/1) | Mixed peri- and/or intratumoral infiltrate Model 1 | OR  | 4.889 | 1.157  | 20.665 |
| KRAS Q61 (0/1) | Mixed peri- and/or intratumoral infiltrate Model 1 | RR1 | 0.375 | 0.132  | 1.064  |
| KRAS Q61 (0/1) | Mixed peri- and/or intratumoral infiltrate Model 1 | RR2 | 2.667 | 2.424  | 2.910  |
| KRAS Q61 (0/1) | Mixed peri- and/or intratumoral infiltrate Model 1 | RR3 | 1.833 | 1.146  | 2.934  |
| KRAS Q61 (0/1) | Mixed peri- and/or intratumoral infiltrate Model 2 | OR  | 3.545 | 0.683  | 18.397 |
| KRAS Q61 (0/1) | Mixed peri- and/or intratumoral infiltrate Model 2 | RR1 | 0.385 | 0.099  | 1.489  |
| KRAS Q61 (0/1) | Mixed peri- and/or intratumoral infiltrate Model 2 | RR2 | 2.597 | 2.311  | 2.883  |
| KRAS Q61 (0/1) | Mixed peri- and/or intratumoral infiltrate Model 3 | OR  | 1.500 | 0.271  | 8.300  |
| KRAS Q61 (0/1) | Mixed peri- and/or intratumoral infiltrate Model 3 | RR1 | 0.714 | 0.169  | 3.027  |
| KRAS Q61 (0/1) | Mixed peri- and/or intratumoral infiltrate Model 3 | RR2 | 1.401 | 0.856  | 1.946  |
| KRAS Q61 (0/1) | Mixed peri- and/or intratumoral infiltrate Model 3 | RR3 | 1.071 | 0.817  | 1.404  |
| KRAS Q61 (0/1) | Mixed peri- and/or intratumoral infiltrate Model 2 | RR3 | 1.364 | 0.978  | 1.902  |
| KRAS Q61 (0/1) | Lymphocyte peri- and/or intratumoral Model 1       | OR  | 0.745 | 0.219  | 2.531  |
| KRAS Q61 (0/1) | Lymphocyte peri- and/or intratumoral Model 1       | RR1 | 1.137 | 0.679  | 1.904  |
| KRAS Q61 (0/1) | Lymphocyte peri- and/or intratumoral Model 1       | RR2 | 0.880 | 0.422  | 1.338  |
| KRAS Q61 (0/1) | Lymphocyte peri- and/or intratumoral Model 1       | RR3 | 0.847 | 0.417  | 1.722  |
| KRAS Q61 (0/1) | Lymphocyte peri- and/or intratumoral Model 2       | OR  | 0.400 | 0.100  | 1.599  |
| KRAS Q61 (0/1) | Lymphocyte peri- and/or intratumoral Model 2       | RR1 | 2.000 | 0.719  | 5.561  |
| KRAS Q61 (0/1) | Lymphocyte peri- and/or intratumoral Model 2       | RR2 | 0.500 | -0.781 | 1.781  |
| KRAS Q61 (0/1) | Lymphocyte peri- and/or intratumoral Model 2       | RR3 | 0.800 | 0.544  | 1.177  |
| KRAS Q61 (0/1) | Lymphocyte peri- and/or intratumoral Model 3       | OR  | 0.400 | 0.023  | 6.848  |



|                |                                                  |     |       |        |        |
|----------------|--------------------------------------------------|-----|-------|--------|--------|
| KRAS Q61 (0/1) | Lymphocyte peri- and/or intratumoral Model 3     | RR1 | 2.400 | 0.160  | 35.911 |
| KRAS Q61 (0/1) | Lymphocyte peri- and/or intratumoral Model 3     | RR2 | 0.417 | -1.823 | 2.657  |
| KRAS Q61 (0/1) | Lymphocyte peri- and/or intratumoral Model 3     | RR3 | 0.960 | 0.830  | 1.111  |
| KRAS Q61 (0/1) | PMN peri- and/or intratumoral infiltrate Model 1 | OR  | 0.783 | 0.225  | 2.723  |
| KRAS Q61 (0/1) | PMN peri- and/or intratumoral infiltrate Model 1 | RR1 | 1.167 | 0.540  | 2.522  |
| KRAS Q61 (0/1) | PMN peri- and/or intratumoral infiltrate Model 1 | RR2 | 0.857 | 0.230  | 1.484  |
| KRAS Q61 (0/1) | PMN peri- and/or intratumoral infiltrate Model 1 | RR3 | 0.913 | 0.566  | 1.472  |
| KRAS Q61 (0/1) | PMN peri- and/or intratumoral infiltrate Model 2 | OR  | 0.500 | 0.129  | 1.940  |
| KRAS Q61 (0/1) | PMN peri- and/or intratumoral infiltrate Model 2 | RR1 | 1.667 | 0.628  | 4.420  |
| KRAS Q61 (0/1) | PMN peri- and/or intratumoral infiltrate Model 2 | RR2 | 0.600 | -0.439 | 1.639  |
| KRAS Q61 (0/1) | PMN peri- and/or intratumoral infiltrate Model 2 | RR3 | 0.833 | 0.562  | 1.236  |
| KRAS Q61 (0/1) | PMN peri- and/or intratumoral infiltrate Model 3 | OR  | 0.242 | 0.036  | 1.633  |
| KRAS Q61 (0/1) | PMN peri- and/or intratumoral infiltrate Model 3 | RR1 | 3.500 | 0.650  | 18.852 |
| KRAS Q61 (0/1) | PMN peri- and/or intratumoral infiltrate Model 3 | RR2 | 0.286 | -2.564 | 3.136  |
| KRAS Q61 (0/1) | PMN peri- and/or intratumoral infiltrate Model 3 | RR3 | 0.848 | 0.650  | 1.107  |
| NRAS Q61 (0/1) | Tumor Localization (left/right)                  | OR  | 4.160 | 1.226  | 14.113 |
| NRAS Q61 (0/1) | Tumor Localization (left/right)                  | RR1 | 0.363 | 0.147  | 0.899  |
| NRAS Q61 (0/1) | Tumor Localization (left/right)                  | RR2 | 2.755 | 2.539  | 2.971  |
| NRAS Q61 (0/1) | Tumor Localization (left/right)                  | RR3 | 1.510 | 1.042  | 2.188  |
| NRAS Q61 (0/1) | HP differentiation model 1 (1/2)                 | OR  | 1.875 | 0.646  | 5.445  |
| NRAS Q61 (0/1) | HP differentiation model 1 (1/2)                 | RR1 | 0.774 | 0.502  | 1.193  |
| NRAS Q61 (0/1) | HP differentiation model 1 (1/2)                 | RR2 | 1.292 | 1.020  | 1.564  |
| NRAS Q61 (0/1) | HP differentiation model 1 (1/2)                 | RR3 | 1.452 | 0.761  | 2.768  |
| NRAS Q61 (0/1) | HP differentiation model 2 (1/2)                 | OR  | 0.200 | 0.022  | 1.832  |
| NRAS Q61 (0/1) | HP differentiation model 2 (1/2)                 | RR1 | 4.355 | 0.542  | 35.002 |
| NRAS Q61 (0/1) | HP differentiation model 2 (1/2)                 | RR2 | 0.230 | -3.583 | 4.043  |
| NRAS Q61 (0/1) | HP differentiation model 2 (1/2)                 | RR3 | 0.871 | 0.734  | 1.034  |
| NRAS Q61 (0/1) | For HP phenotype with tubular pattern (0/1)      | OR  | 0.192 | 0.020  | 1.832  |

|                |                                             |     |       |        |       |
|----------------|---------------------------------------------|-----|-------|--------|-------|
| NRAS Q61 (0/1) | For HP phenotype with tubular pattern (0/1) | RR1 | 1.136 | 0.959  | 1.346 |
| NRAS Q61 (0/1) | For HP phenotype with tubular pattern (0/1) | RR2 | 0.880 | 0.703  | 1.057 |
| NRAS Q61 (0/1) | For HP phenotype with tubular pattern (0/1) | RR3 | 0.218 | 0.026  | 1.832 |
| NRAS Q61 (0/1) | HP phenotype with cribriform pattern (0/1)  | OR  | 0.789 | 0.277  | 2.252 |
| NRAS Q61 (0/1) | HP phenotype with cribriform pattern (0/1)  | RR1 | 1.103 | 0.712  | 1.710 |
| NRAS Q61 (0/1) | HP phenotype with cribriform pattern (0/1)  | RR2 | 0.907 | 0.516  | 1.298 |
| NRAS Q61 (0/1) | HP phenotype with cribriform pattern (0/1)  | RR3 | 0.871 | 0.472  | 1.606 |
| NRAS Q61 (0/1) | Mucoid HP phenotype (0/1)                   | OR  | 0.263 | 0.064  | 1.083 |
| NRAS Q61 (0/1) | Mucoid HP phenotype (0/1)                   | RR1 | 2.903 | 0.890  | 9.472 |
| NRAS Q61 (0/1) | Mucoid HP phenotype (0/1)                   | RR2 | 0.344 | -1.669 | 2.357 |
| NRAS Q61 (0/1) | Mucoid HP phenotype (0/1)                   | RR3 | 0.762 | 0.578  | 1.005 |
| NRAS Q61 (0/1) | Necrosis (0/1)                              | OR  | 2.670 | 0.886  | 8.046 |
| NRAS Q61 (0/1) | Necrosis (0/1)                              | RR1 | 0.536 | 0.263  | 1.094 |
| NRAS Q61 (0/1) | Necrosis (0/1)                              | RR2 | 1.866 | 1.593  | 2.139 |
| NRAS Q61 (0/1) | Necrosis (0/1)                              | RR3 | 1.431 | 0.941  | 2.175 |
| NRAS Q61 (0/1) | Limits of invasion model 1 (1/2)            | OR  | 0.417 | 0.036  | 4.869 |
| NRAS Q61 (0/1) | Limits of invasion model 1 (1/2)            | RR1 | 1.045 | 0.923  | 1.184 |
| NRAS Q61 (0/1) | Limits of invasion model 1 (1/2)            | RR2 | 0.957 | 0.835  | 1.079 |
| NRAS Q61 (0/1) | Limits of invasion model 1 (1/2)            | RR3 | 0.435 | 0.042  | 4.541 |
| NRAS Q61 (0/1) | Limits of invasion model 2 (1/2)            | OR  | 1.361 | 0.434  | 4.270 |
| NRAS Q61 (0/1) | Limits of invasion model 2 (1/2)            | RR1 | 0.915 | 0.658  | 1.272 |
| NRAS Q61 (0/1) | Limits of invasion model 2 (1/2)            | RR2 | 1.093 | 0.836  | 1.350 |
| NRAS Q61 (0/1) | Limits of invasion model 2 (1/2)            | RR3 | 1.244 | 0.550  | 2.815 |
| NRAS Q61 (0/1) | Limits of invasion model 3 (1/2)            | OR  | 0.919 | 0.320  | 2.637 |
| NRAS Q61 (0/1) | Limits of invasion model 3 (1/2)            | RR1 | 1.034 | 0.680  | 1.574 |
| NRAS Q61 (0/1) | Limits of invasion model 3 (1/2)            | RR2 | 0.967 | 0.613  | 1.321 |
| NRAS Q61 (0/1) | Limits of invasion model 3 (1/2)            | RR3 | 0.950 | 0.504  | 1.793 |
| NRAS Q61 (0/1) | Limits of invasion model 4 (1/2)            | OR  | 0.909 | 0.307  | 2.696 |

|                |                                                    |     |       |       |        |
|----------------|----------------------------------------------------|-----|-------|-------|--------|
| NRAS Q61 (0/1) | Limits of invasion model 4 (1/2)                   | RR1 | 1.065 | 0.521 | 2.174  |
| NRAS Q61 (0/1) | Limits of invasion model 4 (1/2)                   | RR2 | 0.939 | 0.395 | 1.483  |
| NRAS Q61 (0/1) | Limits of invasion model 4 (1/2)                   | RR3 | 0.968 | 0.666 | 1.406  |
| NRAS Q61 (0/1) | Desmoplastic Reaction Model 1                      | OR  | 3.333 | 0.319 | 34.830 |
| NRAS Q61 (0/1) | Desmoplastic Reaction Model 1                      | RR1 | 0.825 | 0.588 | 1.158  |
| NRAS Q61 (0/1) | Desmoplastic Reaction Model 1                      | RR2 | 1.212 | 0.975 | 1.449  |
| NRAS Q61 (0/1) | Desmoplastic Reaction Model 1                      | RR3 | 2.750 | 0.353 | 21.414 |
| NRAS Q61 (0/1) | Desmoplastic Reaction Model 2                      | OR  | 2.917 | 0.594 | 14.327 |
| NRAS Q61 (0/1) | Desmoplastic Reaction Model 2                      | OR  | 4.800 | 0.459 | 50.155 |
| NRAS Q61 (0/1) | Desmoplastic Reaction Model 2                      | RR1 | 0.589 | 0.272 | 1.278  |
| NRAS Q61 (0/1) | Desmoplastic Reaction Model 2                      | RR2 | 1.698 | 1.381 | 2.015  |
| NRAS Q61 (0/1) | Desmoplastic Reaction Model 2                      | RR3 | 1.719 | 0.721 | 4.098  |
| NRAS Q61 (0/1) | Desmoplastic Reaction Model 2                      | RR3 | 1.760 | 0.934 | 3.317  |
| NRAS Q61 (0/1) | Mixed peri- and/or intratumoral infiltrate Model 1 | OR  | 0.750 | 0.240 | 2.341  |
| NRAS Q61 (0/1) | Mixed peri- and/or intratumoral infiltrate Model 1 | RR1 | 1.167 | 0.629 | 2.163  |
| NRAS Q61 (0/1) | Mixed peri- and/or intratumoral infiltrate Model 1 | RR2 | 0.857 | 0.319 | 1.395  |
| NRAS Q61 (0/1) | Mixed peri- and/or intratumoral infiltrate Model 1 | RR3 | 0.875 | 0.518 | 1.477  |
| NRAS Q61 (0/1) | Mixed peri- and/or intratumoral infiltrate Model 2 | OR  | 0.844 | 0.246 | 2.904  |
| NRAS Q61 (0/1) | Mixed peri- and/or intratumoral infiltrate Model 2 | RR1 | 1.125 | 0.474 | 2.670  |
| NRAS Q61 (0/1) | Mixed peri- and/or intratumoral infiltrate Model 2 | RR2 | 0.889 | 0.238 | 1.540  |
| NRAS Q61 (0/1) | Mixed peri- and/or intratumoral infiltrate Model 2 | RR3 | 0.950 | 0.655 | 1.378  |
| NRAS Q61 (0/1) | Mixed peri- and/or intratumoral infiltrate Model 3 | OR  | 1.082 | 0.252 | 4.645  |
| NRAS Q61 (0/1) | Mixed peri- and/or intratumoral infiltrate Model 3 | RR1 | 0.938 | 0.286 | 3.072  |
| NRAS Q61 (0/1) | Mixed peri- and/or intratumoral infiltrate Model 3 | RR2 | 1.066 | 0.414 | 1.718  |
| NRAS Q61 (0/1) | Mixed peri- and/or intratumoral infiltrate Model 3 | RR3 | 1.015 | 0.775 | 1.329  |
| NRAS Q61 (0/1) | Lymphocyte peri- and/or intratumoral Model 1       | OR  | 1.167 | 0.379 | 3.587  |
| NRAS Q61 (0/1) | Lymphocyte peri- and/or intratumoral Model 1       | RR1 | 0.933 | 0.567 | 1.538  |
| NRAS Q61 (0/1) | Lymphocyte peri- and/or intratumoral Model 1       | RR2 | 1.072 | 0.706 | 1.438  |

|                    |                                                  |     |       |        |        |
|--------------------|--------------------------------------------------|-----|-------|--------|--------|
| NRAS Q61 (0/1)     | Lymphocyte peri- and/or intratumoral Model 1     | RR3 | 1.089 | 0.583  | 2.034  |
| NRAS Q61 (0/1)     | Lymphocyte peri- and/or intratumoral Model 2     | OR  | 0.458 | 0.106  | 1.985  |
| NRAS Q61 (0/1)     | Lymphocyte peri- and/or intratumoral Model 2     | RR1 | 1.867 | 0.560  | 6.223  |
| NRAS Q61 (0/1)     | Lymphocyte peri- and/or intratumoral Model 2     | RR2 | 0.536 | -0.771 | 1.843  |
| NRAS Q61 (0/1)     | Lymphocyte peri- and/or intratumoral Model 2     | RR3 | 0.856 | 0.648  | 1.129  |
| NRAS Q61 (0/1)     | Lymphocyte peri- and/or intratumoral Model 3     | OR  | 1.450 | 0.086  | 24.565 |
| NRAS Q61 (0/1)     | Lymphocyte peri- and/or intratumoral Model 3     | RR1 | 0.700 | 0.046  | 10.575 |
| NRAS Q61 (0/1)     | Lymphocyte peri- and/or intratumoral Model 3     | RR2 | 1.429 | 0.775  | 2.083  |
| NRAS Q61 (0/1)     | Lymphocyte peri- and/or intratumoral Model 3     | RR3 | 1.015 | 0.903  | 1.140  |
| NRAS Q61 (0/1)     | PMN peri- and/or intratumoral infiltrate Model 1 | OR  | 0.567 | 0.171  | 1.883  |
| NRAS Q61 (0/1)     | PMN peri- and/or intratumoral infiltrate Model 1 | RR1 | 1.448 | 0.649  | 3.233  |
| NRAS Q61 (0/1)     | PMN peri- and/or intratumoral infiltrate Model 1 | RR2 | 0.691 | -0.108 | 1.490  |
| NRAS Q61 (0/1)     | PMN peri- and/or intratumoral infiltrate Model 1 | RR3 | 0.821 | 0.546  | 1.234  |
| NRAS Q61 (0/1)     | PMN peri- and/or intratumoral infiltrate Model 2 | OR  | 0.370 | 0.087  | 1.585  |
| NRAS Q61 (0/1)     | PMN peri- and/or intratumoral infiltrate Model 2 | RR1 | 2.172 | 0.668  | 7.068  |
| NRAS Q61 (0/1)     | PMN peri- and/or intratumoral infiltrate Model 2 | RR2 | 0.460 | -1.044 | 1.964  |
| NRAS Q61 (0/1)     | PMN peri- and/or intratumoral infiltrate Model 2 | RR3 | 0.805 | 0.596  | 1.086  |
| NRAS Q61 (0/1)     | PMN peri- and/or intratumoral infiltrate Model 3 | OR  | 0.912 | 0.139  | 6.005  |
| NRAS Q61 (0/1)     | PMN peri- and/or intratumoral infiltrate Model 3 | RR1 | 1.086 | 0.199  | 5.939  |
| NRAS Q61 (0/1)     | PMN peri- and/or intratumoral infiltrate Model 3 | RR2 | 0.921 | 0.034  | 1.808  |
| NRAS Q61 (0/1)     | PMN peri- and/or intratumoral infiltrate Model 3 | RR3 | 0.991 | 0.823  | 1.193  |
| NRAS G12/G13 (0/1) | Tumor Localization (left/right)                  | OR  | 3.482 | 0.692  | 17.515 |
| NRAS G12/G13 (0/1) | Tumor Localization (left/right)                  | RR1 | 0.382 | 0.099  | 1.479  |
| NRAS G12/G13 (0/1) | Tumor Localization (left/right)                  | RR2 | 2.618 | 2.335  | 2.901  |
| NRAS G12/G13 (0/1) | Tumor Localization (left/right)                  | RR3 | 1.331 | 0.991  | 1.788  |
| NRAS G12/G13 (0/1) | HP differentiation model 1 (1/2)                 | OR  | 1.338 | 0.409  | 4.374  |
| NRAS G12/G13 (0/1) | HP differentiation model 1 (1/2)                 | RR1 | 0.882 | 0.518  | 1.501  |
| NRAS G12/G13 (0/1) | HP differentiation model 1 (1/2)                 | RR2 | 1.134 | 0.770  | 1.498  |

|                    |                                            |     |       |        |        |
|--------------------|--------------------------------------------|-----|-------|--------|--------|
| NRAS G12/G13 (0/1) | HP differentiation model 1 (1/2)           | RR3 | 1.180 | 0.613  | 2.273  |
| NRAS G12/G13 (0/1) | HP differentiation model 2 (1/2)           | OR  | 0.300 | 0.053  | 1.684  |
| NRAS G12/G13 (0/1) | HP differentiation model 2 (1/2)           | RR1 | 2.867 | 0.647  | 12.700 |
| NRAS G12/G13 (0/1) | HP differentiation model 2 (1/2)           | RR2 | 0.349 | -1.871 | 2.569  |
| NRAS G12/G13 (0/1) | HP differentiation model 2 (1/2)           | RR3 | 0.860 | 0.659  | 1.122  |
| NRAS G12/G13 (0/1) | HP phenotype with cribriform pattern (0/1) | OR  | 1.338 | 0.409  | 4.374  |
| NRAS G12/G13 (0/1) | HP phenotype with cribriform pattern (0/1) | RR1 | 0.882 | 0.518  | 1.501  |
| NRAS G12/G13 (0/1) | HP phenotype with cribriform pattern (0/1) | RR2 | 1.134 | 0.770  | 1.498  |
| NRAS G12/G13 (0/1) | HP phenotype with cribriform pattern (0/1) | RR3 | 1.180 | 0.613  | 2.273  |
| NRAS G12/G13 (0/1) | Mucoid HP phenotype (0/1)                  | OR  | 0.728 | 0.187  | 2.836  |
| NRAS G12/G13 (0/1) | Mucoid HP phenotype (0/1)                  | RR1 | 1.274 | 0.459  | 3.536  |
| NRAS G12/G13 (0/1) | Mucoid HP phenotype (0/1)                  | RR2 | 0.785 | -0.030 | 1.600  |
| NRAS G12/G13 (0/1) | Mucoid HP phenotype (0/1)                  | RR3 | 0.927 | 0.659  | 1.305  |
| NRAS G12/G13 (0/1) | Necrosis (0/1)                             | OR  | 1.798 | 0.491  | 6.581  |
| NRAS G12/G13 (0/1) | Necrosis (0/1)                             | RR1 | 0.675 | 0.270  | 1.687  |
| NRAS G12/G13 (0/1) | Necrosis (0/1)                             | RR2 | 1.481 | 1.076  | 1.886  |
| NRAS G12/G13 (0/1) | Necrosis (0/1)                             | RR3 | 1.213 | 0.822  | 1.790  |
| NRAS G12/G13 (0/1) | Limits of invasion model 1 (1/2)           | RR1 | 1.075 | 0.991  | 1.167  |
| NRAS G12/G13 (0/1) | Limits of invasion model 1 (1/2)           | RR2 | 0.930 | 0.846  | 1.014  |
| NRAS G12/G13 (0/1) | Limits of invasion model 2 (1/2)           | OR  | 0.839 | 0.225  | 3.130  |
| NRAS G12/G13 (0/1) | Limits of invasion model 2 (1/2)           | RR1 | 1.051 | 0.731  | 1.511  |
| NRAS G12/G13 (0/1) | Limits of invasion model 2 (1/2)           | RR2 | 0.951 | 0.631  | 1.271  |
| NRAS G12/G13 (0/1) | Limits of invasion model 2 (1/2)           | RR3 | 0.882 | 0.340  | 2.290  |
| NRAS G12/G13 (0/1) | Limits of invasion model 3 (1/2)           | OR  | 1.020 | 0.307  | 3.386  |
| NRAS G12/G13 (0/1) | Limits of invasion model 3 (1/2)           | RR1 | 0.992 | 0.615  | 1.602  |
| NRAS G12/G13 (0/1) | Limits of invasion model 3 (1/2)           | RR2 | 1.008 | 0.631  | 1.385  |
| NRAS G12/G13 (0/1) | Limits of invasion model 3 (1/2)           | RR3 | 1.012 | 0.492  | 2.082  |
| NRAS G12/G13 (0/1) | Limits of invasion model 4 (1/2)           | OR  | 1.071 | 0.309  | 3.715  |

|                    |                                                    |     |       |        |        |
|--------------------|----------------------------------------------------|-----|-------|--------|--------|
| NRAS G12/G13 (0/1) | Limits of invasion model 4 (1/2)                   | RR1 | 0.956 | 0.419  | 2.178  |
| NRAS G12/G13 (0/1) | Limits of invasion model 4 (1/2)                   | RR2 | 1.046 | 0.509  | 1.583  |
| NRAS G12/G13 (0/1) | Limits of invasion model 4 (1/2)                   | RR3 | 1.024 | 0.673  | 1.557  |
| NRAS G12/G13 (0/1) | Desmoplastic Reaction Model 1                      | RR1 | 1.313 | 1.033  | 1.667  |
| NRAS G12/G13 (0/1) | Desmoplastic Reaction Model 1                      | RR2 | 0.762 | 0.482  | 1.042  |
| NRAS G12/G13 (0/1) | Desmoplastic Reaction Model 2                      | OR  | 2.200 | 0.329  | 14.726 |
| NRAS G12/G13 (0/1) | Desmoplastic Reaction Model 2                      | RR1 | 0.636 | 0.191  | 2.119  |
| NRAS G12/G13 (0/1) | Desmoplastic Reaction Model 2                      | RR2 | 1.572 | 1.127  | 2.017  |
| NRAS G12/G13 (0/1) | Desmoplastic Reaction Model 2                      | RR3 | 1.400 | 0.680  | 2.882  |
| NRAS G12/G13 (0/1) | Mixed peri- and/or intratumoral infiltrate Model 1 | OR  | 0.544 | 0.146  | 2.035  |
| NRAS G12/G13 (0/1) | Mixed peri- and/or intratumoral infiltrate Model 1 | RR1 | 1.349 | 0.737  | 2.468  |
| NRAS G12/G13 (0/1) | Mixed peri- and/or intratumoral infiltrate Model 1 | RR2 | 0.741 | 0.129  | 1.353  |
| NRAS G12/G13 (0/1) | Mixed peri- and/or intratumoral infiltrate Model 1 | RR3 | 0.734 | 0.355  | 1.517  |
| NRAS G12/G13 (0/1) | Mixed peri- and/or intratumoral infiltrate Model 2 | OR  | 0.321 | 0.083  | 1.250  |
| NRAS G12/G13 (0/1) | Mixed peri- and/or intratumoral infiltrate Model 2 | RR1 | 2.056 | 0.922  | 4.584  |
| NRAS G12/G13 (0/1) | Mixed peri- and/or intratumoral infiltrate Model 2 | RR2 | 0.486 | -0.648 | 1.620  |
| NRAS G12/G13 (0/1) | Mixed peri- and/or intratumoral infiltrate Model 2 | RR3 | 0.661 | 0.365  | 1.197  |
| NRAS G12/G13 (0/1) | Mixed peri- and/or intratumoral infiltrate Model 3 | OR  | 0.581 | 0.121  | 2.797  |
| NRAS G12/G13 (0/1) | Mixed peri- and/or intratumoral infiltrate Model 3 | RR1 | 1.542 | 0.454  | 5.240  |
| NRAS G12/G13 (0/1) | Mixed peri- and/or intratumoral infiltrate Model 3 | RR2 | 0.649 | -0.439 | 1.737  |
| NRAS G12/G13 (0/1) | Mixed peri- and/or intratumoral infiltrate Model 3 | RR3 | 0.895 | 0.627  | 1.278  |
| NRAS G12/G13 (0/1) | Lymphocyte peri- and/or intratumoral Model 1       | OR  | 0.833 | 0.225  | 3.085  |
| NRAS G12/G13 (0/1) | Lymphocyte peri- and/or intratumoral Model 1       | RR1 | 1.083 | 0.619  | 1.896  |
| NRAS G12/G13 (0/1) | Lymphocyte peri- and/or intratumoral Model 1       | RR2 | 0.923 | 0.459  | 1.387  |
| NRAS G12/G13 (0/1) | Lymphocyte peri- and/or intratumoral Model 1       | RR3 | 0.903 | 0.426  | 1.912  |
| NRAS G12/G13 (0/1) | Lymphocyte peri- and/or intratumoral Model 2       | OR  | 0.774 | 0.169  | 3.541  |
| NRAS G12/G13 (0/1) | Lymphocyte peri- and/or intratumoral Model 2       | RR1 | 1.219 | 0.383  | 3.882  |
| NRAS G12/G13 (0/1) | Lymphocyte peri- and/or intratumoral Model 2       | RR2 | 0.820 | -0.016 | 1.656  |

|                    |                                                  |     |       |        |        |
|--------------------|--------------------------------------------------|-----|-------|--------|--------|
| NRAS G12/G13 (0/1) | Lymphocyte peri- and/or intratumoral Model 2     | RR3 | 0.944 | 0.656  | 1.357  |
| NRAS G12/G13 (0/1) | Lymphocyte peri- and/or intratumoral Model 3     | RR3 | 1.054 | 0.980  | 1.134  |
| NRAS G12/G13 (0/1) | PMN peri- and/or intratumoral infiltrate Model 1 | OR  | 1.167 | 0.297  | 4.588  |
| NRAS G12/G13 (0/1) | PMN peri- and/or intratumoral infiltrate Model 1 | RR1 | 0.905 | 0.367  | 2.230  |
| NRAS G12/G13 (0/1) | PMN peri- and/or intratumoral infiltrate Model 1 | RR2 | 1.105 | 0.567  | 1.643  |
| NRAS G12/G13 (0/1) | PMN peri- and/or intratumoral infiltrate Model 1 | RR3 | 1.056 | 0.661  | 1.686  |
| NRAS G12/G13 (0/1) | PMN peri- and/or intratumoral infiltrate Model 2 | OR  | 1.786 | 0.332  | 9.592  |
| NRAS G12/G13 (0/1) | PMN peri- and/or intratumoral infiltrate Model 2 | RR1 | 0.633 | 0.161  | 2.499  |
| NRAS G12/G13 (0/1) | PMN peri- and/or intratumoral infiltrate Model 2 | RR2 | 1.580 | 1.108  | 2.052  |
| NRAS G12/G13 (0/1) | PMN peri- and/or intratumoral infiltrate Model 2 | RR3 | 1.131 | 0.824  | 1.552  |
| NRAS G12/G13 (0/1) | PMN peri- and/or intratumoral infiltrate Model 3 | OR  | 1.294 | 0.130  | 12.835 |
| NRAS G12/G13 (0/1) | PMN peri- and/or intratumoral infiltrate Model 3 | RR1 | 0.792 | 0.098  | 6.420  |
| NRAS G12/G13 (0/1) | PMN peri- and/or intratumoral infiltrate Model 3 | RR2 | 1.263 | 0.569  | 1.957  |
| NRAS G12/G13 (0/1) | PMN peri- and/or intratumoral infiltrate Model 3 | RR3 | 1.025 | 0.837  | 1.254  |
| BRAF (0/1)         | Tumor Localization (left/right)                  | OR  | 1.939 | 0.562  | 6.698  |
| BRAF (0/1)         | Tumor Localization (left/right)                  | RR1 | 0.640 | 0.287  | 1.427  |
| BRAF (0/1)         | Tumor Localization (left/right)                  | RR2 | 1.563 | 1.210  | 1.916  |
| BRAF (0/1)         | Tumor Localization (left/right)                  | RR3 | 1.240 | 0.792  | 1.943  |
| BRAF (0/1)         | HP differentiation model 1 (1/2)                 | OR  | 1.080 | 0.326  | 3.577  |
| BRAF (0/1)         | HP differentiation model 1 (1/2)                 | RR1 | 0.969 | 0.597  | 1.574  |
| BRAF (0/1)         | HP differentiation model 1 (1/2)                 | RR2 | 1.032 | 0.660  | 1.404  |
| BRAF (0/1)         | HP differentiation model 1 (1/2)                 | RR3 | 1.047 | 0.513  | 2.135  |
| BRAF (0/1)         | HP differentiation model 2 (1/2)                 | OR  | 0.543 | 0.058  | 5.062  |
| BRAF (0/1)         | HP differentiation model 2 (1/2)                 | RR1 | 1.744 | 0.221  | 13.754 |
| BRAF (0/1)         | HP differentiation model 2 (1/2)                 | RR2 | 0.573 | -0.950 | 2.096  |
| BRAF (0/1)         | HP differentiation model 2 (1/2)                 | RR3 | 0.947 | 0.796  | 1.126  |
| BRAF (0/1)         | For HP phenotype with tubular pattern (0/1)      | OR  | 1.436 | 0.148  | 13.965 |
| BRAF (0/1)         | For HP phenotype with tubular pattern (0/1)      | RR1 | 0.972 | 0.823  | 1.147  |

|            |                                             |     |       |       |        |
|------------|---------------------------------------------|-----|-------|-------|--------|
| BRAF (0/1) | For HP phenotype with tubular pattern (0/1) | RR2 | 1.029 | 0.880 | 1.178  |
| BRAF (0/1) | For HP phenotype with tubular pattern (0/1) | RR3 | 1.395 | 0.169 | 11.521 |
| BRAF (0/1) | HP phenotype with cribriform pattern (0/1)  | OR  | 0.747 | 0.229 | 2.442  |
| BRAF (0/1) | HP phenotype with cribriform pattern (0/1)  | RR1 | 1.134 | 0.666 | 1.929  |
| BRAF (0/1) | HP phenotype with cribriform pattern (0/1)  | RR2 | 0.882 | 0.414 | 1.350  |
| BRAF (0/1) | HP phenotype with cribriform pattern (0/1)  | RR3 | 0.847 | 0.440 | 1.631  |
| BRAF (0/1) | Mucoid HP phenotype (0/1)                   | OR  | 1.374 | 0.353 | 5.352  |
| BRAF (0/1) | Mucoid HP phenotype (0/1)                   | RR1 | 0.785 | 0.283 | 2.178  |
| BRAF (0/1) | Mucoid HP phenotype (0/1)                   | RR2 | 1.274 | 0.772 | 1.776  |
| BRAF (0/1) | Mucoid HP phenotype (0/1)                   | RR3 | 1.078 | 0.766 | 1.517  |
| BRAF (0/1) | Necrosis (0/1)                              | OR  | 1.244 | 0.372 | 4.167  |
| BRAF (0/1) | Necrosis (0/1)                              | RR1 | 0.872 | 0.415 | 1.832  |
| BRAF (0/1) | Necrosis (0/1)                              | RR2 | 1.147 | 0.690 | 1.604  |
| BRAF (0/1) | Necrosis (0/1)                              | RR3 | 1.085 | 0.680 | 1.732  |
| BRAF (0/1) | Limits of invasion model 1 (1/2)            | OR  | 0.155 | 0.013 | 1.848  |
| BRAF (0/1) | Limits of invasion model 1 (1/2)            | RR1 | 1.127 | 0.919 | 1.382  |
| BRAF (0/1) | Limits of invasion model 1 (1/2)            | RR2 | 0.887 | 0.679 | 1.095  |
| BRAF (0/1) | Limits of invasion model 1 (1/2)            | RR3 | 0.174 | 0.017 | 1.788  |
| BRAF (0/1) | Limits of invasion model 2 (1/2)            | OR  | 1.192 | 0.319 | 4.445  |
| BRAF (0/1) | Limits of invasion model 2 (1/2)            | RR1 | 0.951 | 0.662 | 1.368  |
| BRAF (0/1) | Limits of invasion model 2 (1/2)            | RR2 | 1.052 | 0.763 | 1.341  |
| BRAF (0/1) | Limits of invasion model 2 (1/2)            | RR3 | 1.134 | 0.437 | 2.944  |
| BRAF (0/1) | Limits of invasion model 3 (1/2)            | OR  | 0.981 | 0.295 | 3.257  |
| BRAF (0/1) | Limits of invasion model 3 (1/2)            | RR1 | 1.008 | 0.624 | 1.626  |
| BRAF (0/1) | Limits of invasion model 3 (1/2)            | RR2 | 0.992 | 0.608 | 1.376  |
| BRAF (0/1) | Limits of invasion model 3 (1/2)            | RR3 | 0.988 | 0.480 | 2.034  |
| BRAF (0/1) | Limits of invasion model 4 (1/2)            | OR  | 0.933 | 0.269 | 3.236  |
| BRAF (0/1) | Limits of invasion model 4 (1/2)            | RR1 | 1.047 | 0.459 | 2.386  |



|            |                                                    |     |       |       |        |
|------------|----------------------------------------------------|-----|-------|-------|--------|
| BRAF (0/1) | Limits of invasion model 4 (1/2)                   | RR2 | 0.955 | 0.367 | 1.543  |
| BRAF (0/1) | Limits of invasion model 4 (1/2)                   | RR3 | 0.977 | 0.642 | 1.486  |
| BRAF (0/1) | Desmoplastic Reaction Model 1                      | OR  | 1.500 | 0.138 | 16.268 |
| BRAF (0/1) | Desmoplastic Reaction Model 1                      | RR1 | 0.933 | 0.642 | 1.356  |
| BRAF (0/1) | Desmoplastic Reaction Model 1                      | RR2 | 1.072 | 0.781 | 1.363  |
| BRAF (0/1) | Desmoplastic Reaction Model 1                      | RR3 | 1.400 | 0.187 | 10.503 |
| BRAF (0/1) | Desmoplastic Reaction Model 2                      | OR  | 1.630 | 0.287 | 9.256  |
| BRAF (0/1) | Desmoplastic Reaction Model 2                      | RR1 | 0.788 | 0.352 | 1.760  |
| BRAF (0/1) | Desmoplastic Reaction Model 2                      | RR2 | 1.269 | 0.833 | 1.705  |
| BRAF (0/1) | Desmoplastic Reaction Model 2                      | RR3 | 1.283 | 0.500 | 3.294  |
| BRAF (0/1) | Mixed peri- and/or intratumoral infiltrate Model 1 | OR  | 0.754 | 0.202 | 2.812  |
| BRAF (0/1) | Mixed peri- and/or intratumoral infiltrate Model 1 | RR1 | 1.168 | 0.553 | 2.464  |
| BRAF (0/1) | Mixed peri- and/or intratumoral infiltrate Model 1 | RR2 | 0.856 | 0.241 | 1.471  |
| BRAF (0/1) | Mixed peri- and/or intratumoral infiltrate Model 1 | RR3 | 0.880 | 0.497 | 1.560  |
| BRAF (0/1) | Mixed peri- and/or intratumoral infiltrate Model 2 | OR  | 1.182 | 0.294 | 4.754  |
| BRAF (0/1) | Mixed peri- and/or intratumoral infiltrate Model 2 | RR1 | 0.892 | 0.348 | 2.286  |
| BRAF (0/1) | Mixed peri- and/or intratumoral infiltrate Model 2 | RR2 | 1.121 | 0.577 | 1.665  |
| BRAF (0/1) | Mixed peri- and/or intratumoral infiltrate Model 2 | RR3 | 1.054 | 0.671 | 1.656  |
| BRAF (0/1) | Mixed peri- and/or intratumoral infiltrate Model 3 | OR  | 1.722 | 0.358 | 8.295  |
| BRAF (0/1) | Mixed peri- and/or intratumoral infiltrate Model 3 | RR1 | 0.649 | 0.191 | 2.205  |
| BRAF (0/1) | Mixed peri- and/or intratumoral infiltrate Model 3 | RR2 | 1.541 | 1.083 | 1.999  |
| BRAF (0/1) | Mixed peri- and/or intratumoral infiltrate Model 3 | RR3 | 1.117 | 0.782 | 1.595  |
| BRAF (0/1) | Lymphocyte peri- and/or intratumoral Model 1       | OR  | 1.440 | 0.398 | 5.211  |
| BRAF (0/1) | Lymphocyte peri- and/or intratumoral Model 1       | RR1 | 0.855 | 0.506 | 1.446  |
| BRAF (0/1) | Lymphocyte peri- and/or intratumoral Model 1       | RR2 | 1.170 | 0.821 | 1.519  |
| BRAF (0/1) | Lymphocyte peri- and/or intratumoral Model 1       | RR3 | 1.232 | 0.573 | 2.646  |
| BRAF (0/1) | Lymphocyte peri- and/or intratumoral Model 2       | OR  | 1.125 | 0.249 | 5.080  |
| BRAF (0/1) | Lymphocyte peri- and/or intratumoral Model 2       | RR1 | 0.912 | 0.284 | 2.933  |

|            |                                                  |     |       |        |        |
|------------|--------------------------------------------------|-----|-------|--------|--------|
| BRAF (0/1) | Lymphocyte peri- and/or intratumoral Model 2     | RR2 | 1.096 | 0.468  | 1.724  |
| BRAF (0/1) | Lymphocyte peri- and/or intratumoral Model 2     | RR3 | 1.026 | 0.730  | 1.442  |
| BRAF (0/1) | Lymphocyte peri- and/or intratumoral Model 3     | OR  | 3.083 | 0.179  | 53.158 |
| BRAF (0/1) | Lymphocyte peri- and/or intratumoral Model 3     | RR1 | 0.342 | 0.023  | 5.087  |
| BRAF (0/1) | Lymphocyte peri- and/or intratumoral Model 3     | RR2 | 2.924 | 2.605  | 3.243  |
| BRAF (0/1) | Lymphocyte peri- and/or intratumoral Model 3     | RR3 | 1.055 | 0.894  | 1.245  |
| BRAF (0/1) | PMN peri- and/or intratumoral infiltrate Model 1 | OR  | 0.857 | 0.218  | 3.371  |
| BRAF (0/1) | PMN peri- and/or intratumoral infiltrate Model 1 | RR1 | 1.105 | 0.448  | 2.724  |
| BRAF (0/1) | PMN peri- and/or intratumoral infiltrate Model 1 | RR2 | 0.905 | 0.248  | 1.562  |
| BRAF (0/1) | PMN peri- and/or intratumoral infiltrate Model 1 | RR3 | 0.947 | 0.593  | 1.513  |
| BRAF (0/1) | PMN peri- and/or intratumoral infiltrate Model 2 | OR  | 1.074 | 0.238  | 4.840  |
| BRAF (0/1) | PMN peri- and/or intratumoral infiltrate Model 2 | RR1 | 0.947 | 0.305  | 2.945  |
| BRAF (0/1) | PMN peri- and/or intratumoral infiltrate Model 2 | RR2 | 1.056 | 0.414  | 1.698  |
| BRAF (0/1) | PMN peri- and/or intratumoral infiltrate Model 2 | RR3 | 1.018 | 0.702  | 1.475  |
| BRAF (0/1) | PMN peri- and/or intratumoral infiltrate Model 3 | OR  | 0.773 | 0.078  | 7.664  |
| BRAF (0/1) | PMN peri- and/or intratumoral infiltrate Model 3 | RR1 | 1.263 | 0.156  | 10.243 |
| BRAF (0/1) | PMN peri- and/or intratumoral infiltrate Model 3 | RR2 | 0.792 | -0.315 | 1.899  |
| BRAF (0/1) | PMN peri- and/or intratumoral infiltrate Model 3 | RR3 | 0.976 | 0.797  | 1.195  |
| EGFR (0/1) | Tumor Localization (left/right)                  | RR3 | 0.702 | 0.592  | 0.831  |
| EGFR (0/1) | HP differentiation model 1 (1/2)                 | RR1 | 0.579 | 0.464  | 0.722  |
| EGFR (0/1) | HP differentiation model 1 (1/2)                 | RR2 | 1.727 | 1.612  | 1.842  |
| EGFR (0/1) | HP differentiation model 2 (1/2)                 | RR3 | 0.895 | 0.819  | 0.978  |
| EGFR (0/1) | For HP phenotype with tubular pattern (0/1)      | RR1 | 0.912 | 0.842  | 0.989  |
| EGFR (0/1) | For HP phenotype with tubular pattern (0/1)      | RR2 | 1.096 | 1.026  | 1.166  |
| EGFR (0/1) | HP phenotype with cribriform pattern (0/1)       | RR1 | 0.579 | 0.464  | 0.722  |
| EGFR (0/1) | HP phenotype with cribriform pattern (0/1)       | RR2 | 1.727 | 1.612  | 1.842  |
| EGFR (0/1) | Mucoid HP phenotype (0/1)                        | RR1 | 0.211 | 0.127  | 0.348  |
| EGFR (0/1) | Mucoid HP phenotype (0/1)                        | RR2 | 4.739 | 4.655  | 4.823  |

|                     |                                                  |     |        |        |        |
|---------------------|--------------------------------------------------|-----|--------|--------|--------|
| EGFR (0/1)          | Necrosis (0/1)                                   | RR3 | 0.632  | 0.518  | 0.770  |
| EGFR (0/1)          | Limits of invasion model 1 (1/2)                 | RR1 | 0.947  | 0.891  | 1.007  |
| EGFR (0/1)          | Limits of invasion model 1 (1/2)                 | RR2 | 1.056  | 1.000  | 1.112  |
| EGFR (0/1)          | Limits of invasion model 2 (1/2)                 | RR1 | 0.702  | 0.592  | 0.831  |
| EGFR (0/1)          | Limits of invasion model 2 (1/2)                 | RR2 | 1.425  | 1.315  | 1.535  |
| EGFR (0/1)          | Limits of invasion model 3 (1/2)                 | RR1 | 0.596  | 0.482  | 0.738  |
| EGFR (0/1)          | Limits of invasion model 3 (1/2)                 | RR2 | 1.678  | 1.564  | 1.792  |
| EGFR (0/1)          | Limits of invasion model 4 (1/2)                 | RR1 | 0.333  | 0.231  | 0.481  |
| EGFR (0/1)          | Limits of invasion model 4 (1/2)                 | RR2 | 3.003  | 2.901  | 3.105  |
| EGFR (0/1)          | Desmoplastic Reaction Model 1                    | RR3 | 0.154  | 0.062  | 0.379  |
| EGFR (0/1)          | Desmoplastic Reaction Model 2                    | RR3 | 0.500  | 0.340  | 0.734  |
| EGFR (0/1)          | Lymphocyte peri- and/or intratumoral Model 1     | RR3 | 0.440  | 0.322  | 0.602  |
| EGFR (0/1)          | Lymphocyte peri- and/or intratumoral Model 2     | RR3 | 0.780  | 0.673  | 0.904  |
| EGFR (0/1)          | Lymphocyte peri- and/or intratumoral Model 3     | RR3 | 0.960  | 0.907  | 1.016  |
| EGFR (0/1)          | PMN peri- and/or intratumoral infiltrate Model 1 | RR1 | 0.347  | 0.236  | 0.509  |
| EGFR (0/1)          | PMN peri- and/or intratumoral infiltrate Model 1 | RR2 | 2.882  | 2.771  | 2.993  |
| EGFR (0/1)          | PMN peri- and/or intratumoral infiltrate Model 2 | RR1 | 0.224  | 0.133  | 0.378  |
| EGFR (0/1)          | PMN peri- and/or intratumoral infiltrate Model 2 | RR2 | 4.464  | 4.373  | 4.555  |
| EGFR (0/1)          | PMN peri- and/or intratumoral infiltrate Model 3 | RR1 | 0.082  | 0.032  | 0.209  |
| EGFR (0/1)          | PMN peri- and/or intratumoral infiltrate Model 3 | RR2 | 12.195 | 12.145 | 12.245 |
| Any NRAS-type (0/1) | Tumor Localization (left/right)                  | RR3 | 1.515  | 1.242  | 1.849  |
| Any NRAS-type (0/1) | HP differentiation model 1 (1/2)                 | OR  | 1.500  | 0.336  | 6.702  |
| Any NRAS-type (0/1) | HP differentiation model 1 (1/2)                 | RR1 | 0.833  | 0.402  | 1.727  |
| Any NRAS-type (0/1) | HP differentiation model 1 (1/2)                 | RR2 | 1.200  | 0.769  | 1.631  |
| Any NRAS-type (0/1) | HP differentiation model 1 (1/2)                 | RR3 | 1.250  | 0.578  | 2.704  |
| Any NRAS-type (0/1) | HP differentiation model 2 (1/2)                 | OR  | 0.106  | 0.017  | 0.674  |
| Any NRAS-type (0/1) | HP differentiation model 2 (1/2)                 | RR1 | 6.250  | 1.517  | 25.744 |
| Any NRAS-type (0/1) | HP differentiation model 2 (1/2)                 | RR2 | 0.160  | -4.573 | 4.893  |

|                     |                                             |     |       |        |        |
|---------------------|---------------------------------------------|-----|-------|--------|--------|
| Any NRAS-type (0/1) | HP differentiation model 2 (1/2)            | RR3 | 0.665 | 0.387  | 1.142  |
| Any NRAS-type (0/1) | For HP phenotype with tubular pattern (0/1) | RR3 | 1.111 | 1.013  | 1.219  |
| Any NRAS-type (0/1) | HP phenotype with cribriform pattern (0/1)  | OR  | 0.829 | 0.178  | 3.856  |
| Any NRAS-type (0/1) | HP phenotype with cribriform pattern (0/1)  | RR1 | 1.078 | 0.600  | 1.937  |
| Any NRAS-type (0/1) | HP phenotype with cribriform pattern (0/1)  | RR2 | 0.928 | 0.450  | 1.406  |
| Any NRAS-type (0/1) | HP phenotype with cribriform pattern (0/1)  | RR3 | 0.893 | 0.345  | 2.313  |
| Any NRAS-type (0/1) | Mucoid HP phenotype (0/1)                   | OR  | 0.417 | 0.085  | 2.044  |
| Any NRAS-type (0/1) | Mucoid HP phenotype (0/1)                   | RR1 | 1.875 | 0.655  | 5.371  |
| Any NRAS-type (0/1) | Mucoid HP phenotype (0/1)                   | RR2 | 0.533 | -0.687 | 1.753  |
| Any NRAS-type (0/1) | Mucoid HP phenotype (0/1)                   | RR3 | 0.781 | 0.449  | 1.360  |
| Any NRAS-type (0/1) | Necrosis (0/1)                              | OR  | 4.667 | 0.533  | 40.886 |
| Any NRAS-type (0/1) | Necrosis (0/1)                              | RR1 | 0.313 | 0.048  | 2.017  |
| Any NRAS-type (0/1) | Necrosis (0/1)                              | RR2 | 3.195 | 2.930  | 3.460  |
| Any NRAS-type (0/1) | Necrosis (0/1)                              | RR3 | 1.458 | 1.032  | 2.062  |
| Any NRAS-type (0/1) | Limits of invasion model 1 (1/2)            | RR1 | 1.064 | 0.992  | 1.141  |
| Any NRAS-type (0/1) | Limits of invasion model 1 (1/2)            | RR2 | 0.940 | 0.868  | 1.012  |
| Any NRAS-type (0/1) | Limits of invasion model 2 (1/2)            | OR  | 1.543 | 0.325  | 7.333  |
| Any NRAS-type (0/1) | Limits of invasion model 2 (1/2)            | RR1 | 0.868 | 0.494  | 1.526  |
| Any NRAS-type (0/1) | Limits of invasion model 2 (1/2)            | RR2 | 1.152 | 0.778  | 1.526  |
| Any NRAS-type (0/1) | Limits of invasion model 2 (1/2)            | RR3 | 1.339 | 0.493  | 3.637  |
| Any NRAS-type (0/1) | Limits of invasion model 3 (1/2)            | OR  | 1.632 | 0.364  | 7.305  |
| Any NRAS-type (0/1) | Limits of invasion model 3 (1/2)            | RR1 | 0.806 | 0.390  | 1.667  |
| Any NRAS-type (0/1) | Limits of invasion model 3 (1/2)            | RR2 | 1.241 | 0.825  | 1.657  |
| Any NRAS-type (0/1) | Limits of invasion model 3 (1/2)            | RR3 | 1.316 | 0.604  | 2.865  |
| Any NRAS-type (0/1) | Limits of invasion model 4 (1/2)            | OR  | 1.688 | 0.308  | 9.249  |
| Any NRAS-type (0/1) | Limits of invasion model 4 (1/2)            | RR1 | 0.694 | 0.198  | 2.438  |
| Any NRAS-type (0/1) | Limits of invasion model 4 (1/2)            | RR2 | 1.441 | 0.945  | 1.937  |
| Any NRAS-type (0/1) | Limits of invasion model 4 (1/2)            | RR3 | 1.172 | 0.747  | 1.839  |

|                     |                                                    |     |       |        |        |
|---------------------|----------------------------------------------------|-----|-------|--------|--------|
| Any NRAS-type (0/1) | Desmoplastic Reaction Model 1                      | RR1 | 1.263 | 1.029  | 1.551  |
| Any NRAS-type (0/1) | Desmoplastic Reaction Model 1                      | RR2 | 0.792 | 0.558  | 1.026  |
| Any NRAS-type (0/1) | Desmoplastic Reaction Model 2                      | OR  | 2.000 | 0.159  | 25.115 |
| Any NRAS-type (0/1) | Desmoplastic Reaction Model 2                      | RR1 | 0.667 | 0.128  | 3.470  |
| Any NRAS-type (0/1) | Desmoplastic Reaction Model 2                      | RR2 | 1.499 | 0.960  | 2.038  |
| Any NRAS-type (0/1) | Desmoplastic Reaction Model 2                      | RR3 | 1.333 | 0.545  | 3.262  |
| Any NRAS-type (0/1) | Mixed peri- and/or intratumoral infiltrate Model 1 | OR  | 0.870 | 0.157  | 4.802  |
| Any NRAS-type (0/1) | Mixed peri- and/or intratumoral infiltrate Model 1 | RR1 | 1.075 | 0.454  | 2.545  |
| Any NRAS-type (0/1) | Mixed peri- and/or intratumoral infiltrate Model 1 | RR2 | 0.930 | 0.309  | 1.551  |
| Any NRAS-type (0/1) | Mixed peri- and/or intratumoral infiltrate Model 1 | RR3 | 0.935 | 0.401  | 2.181  |
| Any NRAS-type (0/1) | Mixed peri- and/or intratumoral infiltrate Model 2 | OR  | 0.387 | 0.068  | 2.191  |
| Any NRAS-type (0/1) | Mixed peri- and/or intratumoral infiltrate Model 2 | RR1 | 1.792 | 0.705  | 4.556  |
| Any NRAS-type (0/1) | Mixed peri- and/or intratumoral infiltrate Model 2 | RR2 | 0.558 | -0.529 | 1.645  |
| Any NRAS-type (0/1) | Mixed peri- and/or intratumoral infiltrate Model 2 | RR3 | 0.694 | 0.305  | 1.577  |
| Any NRAS-type (0/1) | Mixed peri- and/or intratumoral infiltrate Model 3 | OR  | 1.143 | 0.117  | 11.177 |
| Any NRAS-type (0/1) | Mixed peri- and/or intratumoral infiltrate Model 3 | RR1 | 0.896 | 0.135  | 5.961  |
| Any NRAS-type (0/1) | Mixed peri- and/or intratumoral infiltrate Model 3 | RR2 | 1.116 | 0.355  | 1.877  |
| Any NRAS-type (0/1) | Mixed peri- and/or intratumoral infiltrate Model 3 | RR3 | 1.024 | 0.696  | 1.505  |
| Any NRAS-type (0/1) | Lymphocyte peri- and/or intratumoral Model 1       | OR  | 0.900 | 0.180  | 4.504  |
| Any NRAS-type (0/1) | Lymphocyte peri- and/or intratumoral Model 1       | RR1 | 1.048 | 0.522  | 2.101  |
| Any NRAS-type (0/1) | Lymphocyte peri- and/or intratumoral Model 1       | RR2 | 0.954 | 0.428  | 1.480  |
| Any NRAS-type (0/1) | Lymphocyte peri- and/or intratumoral Model 1       | RR3 | 0.943 | 0.378  | 2.353  |
| Any NRAS-type (0/1) | Lymphocyte peri- and/or intratumoral Model 2       | OR  | 0.643 | 0.107  | 3.874  |
| Any NRAS-type (0/1) | Lymphocyte peri- and/or intratumoral Model 2       | RR1 | 1.397 | 0.378  | 5.168  |
| Any NRAS-type (0/1) | Lymphocyte peri- and/or intratumoral Model 2       | RR2 | 0.716 | -0.303 | 1.735  |
| Any NRAS-type (0/1) | Lymphocyte peri- and/or intratumoral Model 2       | RR3 | 0.898 | 0.549  | 1.469  |
| Any NRAS-type (0/1) | Lymphocyte peri- and/or intratumoral Model 3       | RR3 | 1.048 | 0.982  | 1.117  |
| Any NRAS-type (0/1) | PMN peri- and/or intratumoral infiltrate Model 1   | OR  | 0.517 | 0.093  | 2.881  |

|                     |                                                  |     |       |        |        |
|---------------------|--------------------------------------------------|-----|-------|--------|--------|
| Any NRAS-type (0/1) | PMN peri- and/or intratumoral infiltrate Model 1 | RR1 | 1.467 | 0.597  | 3.605  |
| Any NRAS-type (0/1) | PMN peri- and/or intratumoral infiltrate Model 1 | RR2 | 0.682 | -0.188 | 1.552  |
| Any NRAS-type (0/1) | PMN peri- and/or intratumoral infiltrate Model 1 | RR3 | 0.759 | 0.331  | 1.736  |
| Any NRAS-type (0/1) | PMN peri- and/or intratumoral infiltrate Model 2 | OR  | 0.588 | 0.094  | 3.696  |
| Any NRAS-type (0/1) | PMN peri- and/or intratumoral infiltrate Model 2 | RR1 | 1.467 | 0.418  | 5.150  |
| Any NRAS-type (0/1) | PMN peri- and/or intratumoral infiltrate Model 2 | RR2 | 0.682 | -0.367 | 1.731  |
| Any NRAS-type (0/1) | PMN peri- and/or intratumoral infiltrate Model 2 | RR3 | 0.863 | 0.479  | 1.553  |
| Any NRAS-type (0/1) | PMN peri- and/or intratumoral infiltrate Model 3 | OR  | 0.500 | 0.046  | 5.404  |
| Any NRAS-type (0/1) | PMN peri- and/or intratumoral infiltrate Model 3 | RR1 | 1.833 | 0.244  | 13.799 |
| Any NRAS-type (0/1) | PMN peri- and/or intratumoral infiltrate Model 3 | RR2 | 0.546 | -1.043 | 2.135  |
| Any NRAS-type (0/1) | PMN peri- and/or intratumoral infiltrate Model 3 | RR3 | 0.917 | 0.633  | 1.327  |
